# Supplementary material for: Potential of Nb2O5 nanofibers in photocatalytic response for organic pollutants remediation
Source: Research Square preprint supplement (doi:10.21203/rs.3.rs-334663/v1), 2021-04-19

# Supplementary material

**Potential of Nb2O5 nanofibers in photocatalytic response for organic pollutants remediation**

**Edson T. Jesus1,2,4, Ailton. J. Moreira 2,3, Mayara C. Sá1,2,4, Gian P. G. Freschi 3, Miryam R. Joya, Maximo S. Li5, Elaine C. Paris1**

*1 Nanotechnology National Laboratory for Agriculture (LNNA), Embrapa Instrumentação, XV de Novembro St., 1452, zip code: 13560-970, São Carlos, SP, Brazil.*

*2 Department of Chemistry, Federal University of São Carlos, Rod. Washington Luiz, km 235, zip code: 13565-905, São Carlos, SP, Brazil.*

*3 LAFFEQ, Institute of Science and Technology, Federal University of Alfenas, UNIFAL-MG 37715-400, Poços de Caldas- MG, Brazil.*

*4Federal Institute of Education, Science and Technology of Maranhão, Baronesa street, zip code: 65250-000, Alcântara, MA, Brazil.*

*5Instituto de Física, Universidade de São Paulo, São Carlos, SP, 13563-120, Brasil.*

*Corresponding author. Fone.: +55 16 2107-2868.

E-mail address: elaine.paris@embrapa.br (Elaine C. Paris)

# Fig. S1. TG and DTG results of NAO (a), PVP (b), and of the blankets EtOH_NAO (c) and MeOH_NAO (d) obtained after electrospinning.


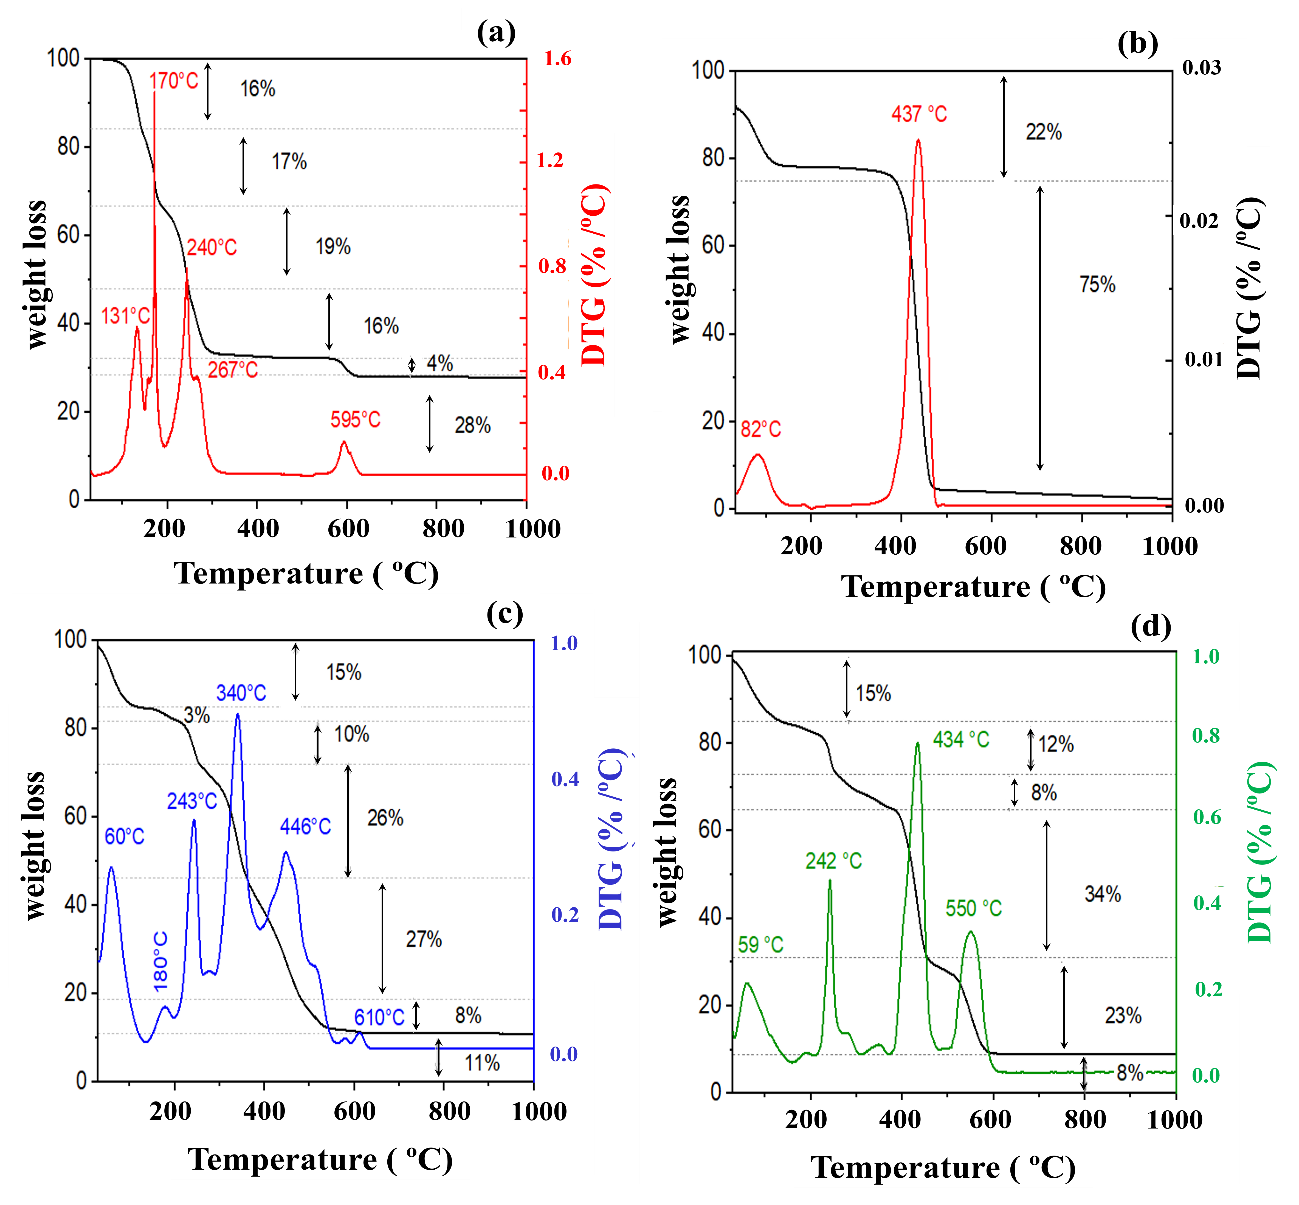


**Fig. S2.** Infrared spectra of the Nb2O5 nanofibers.


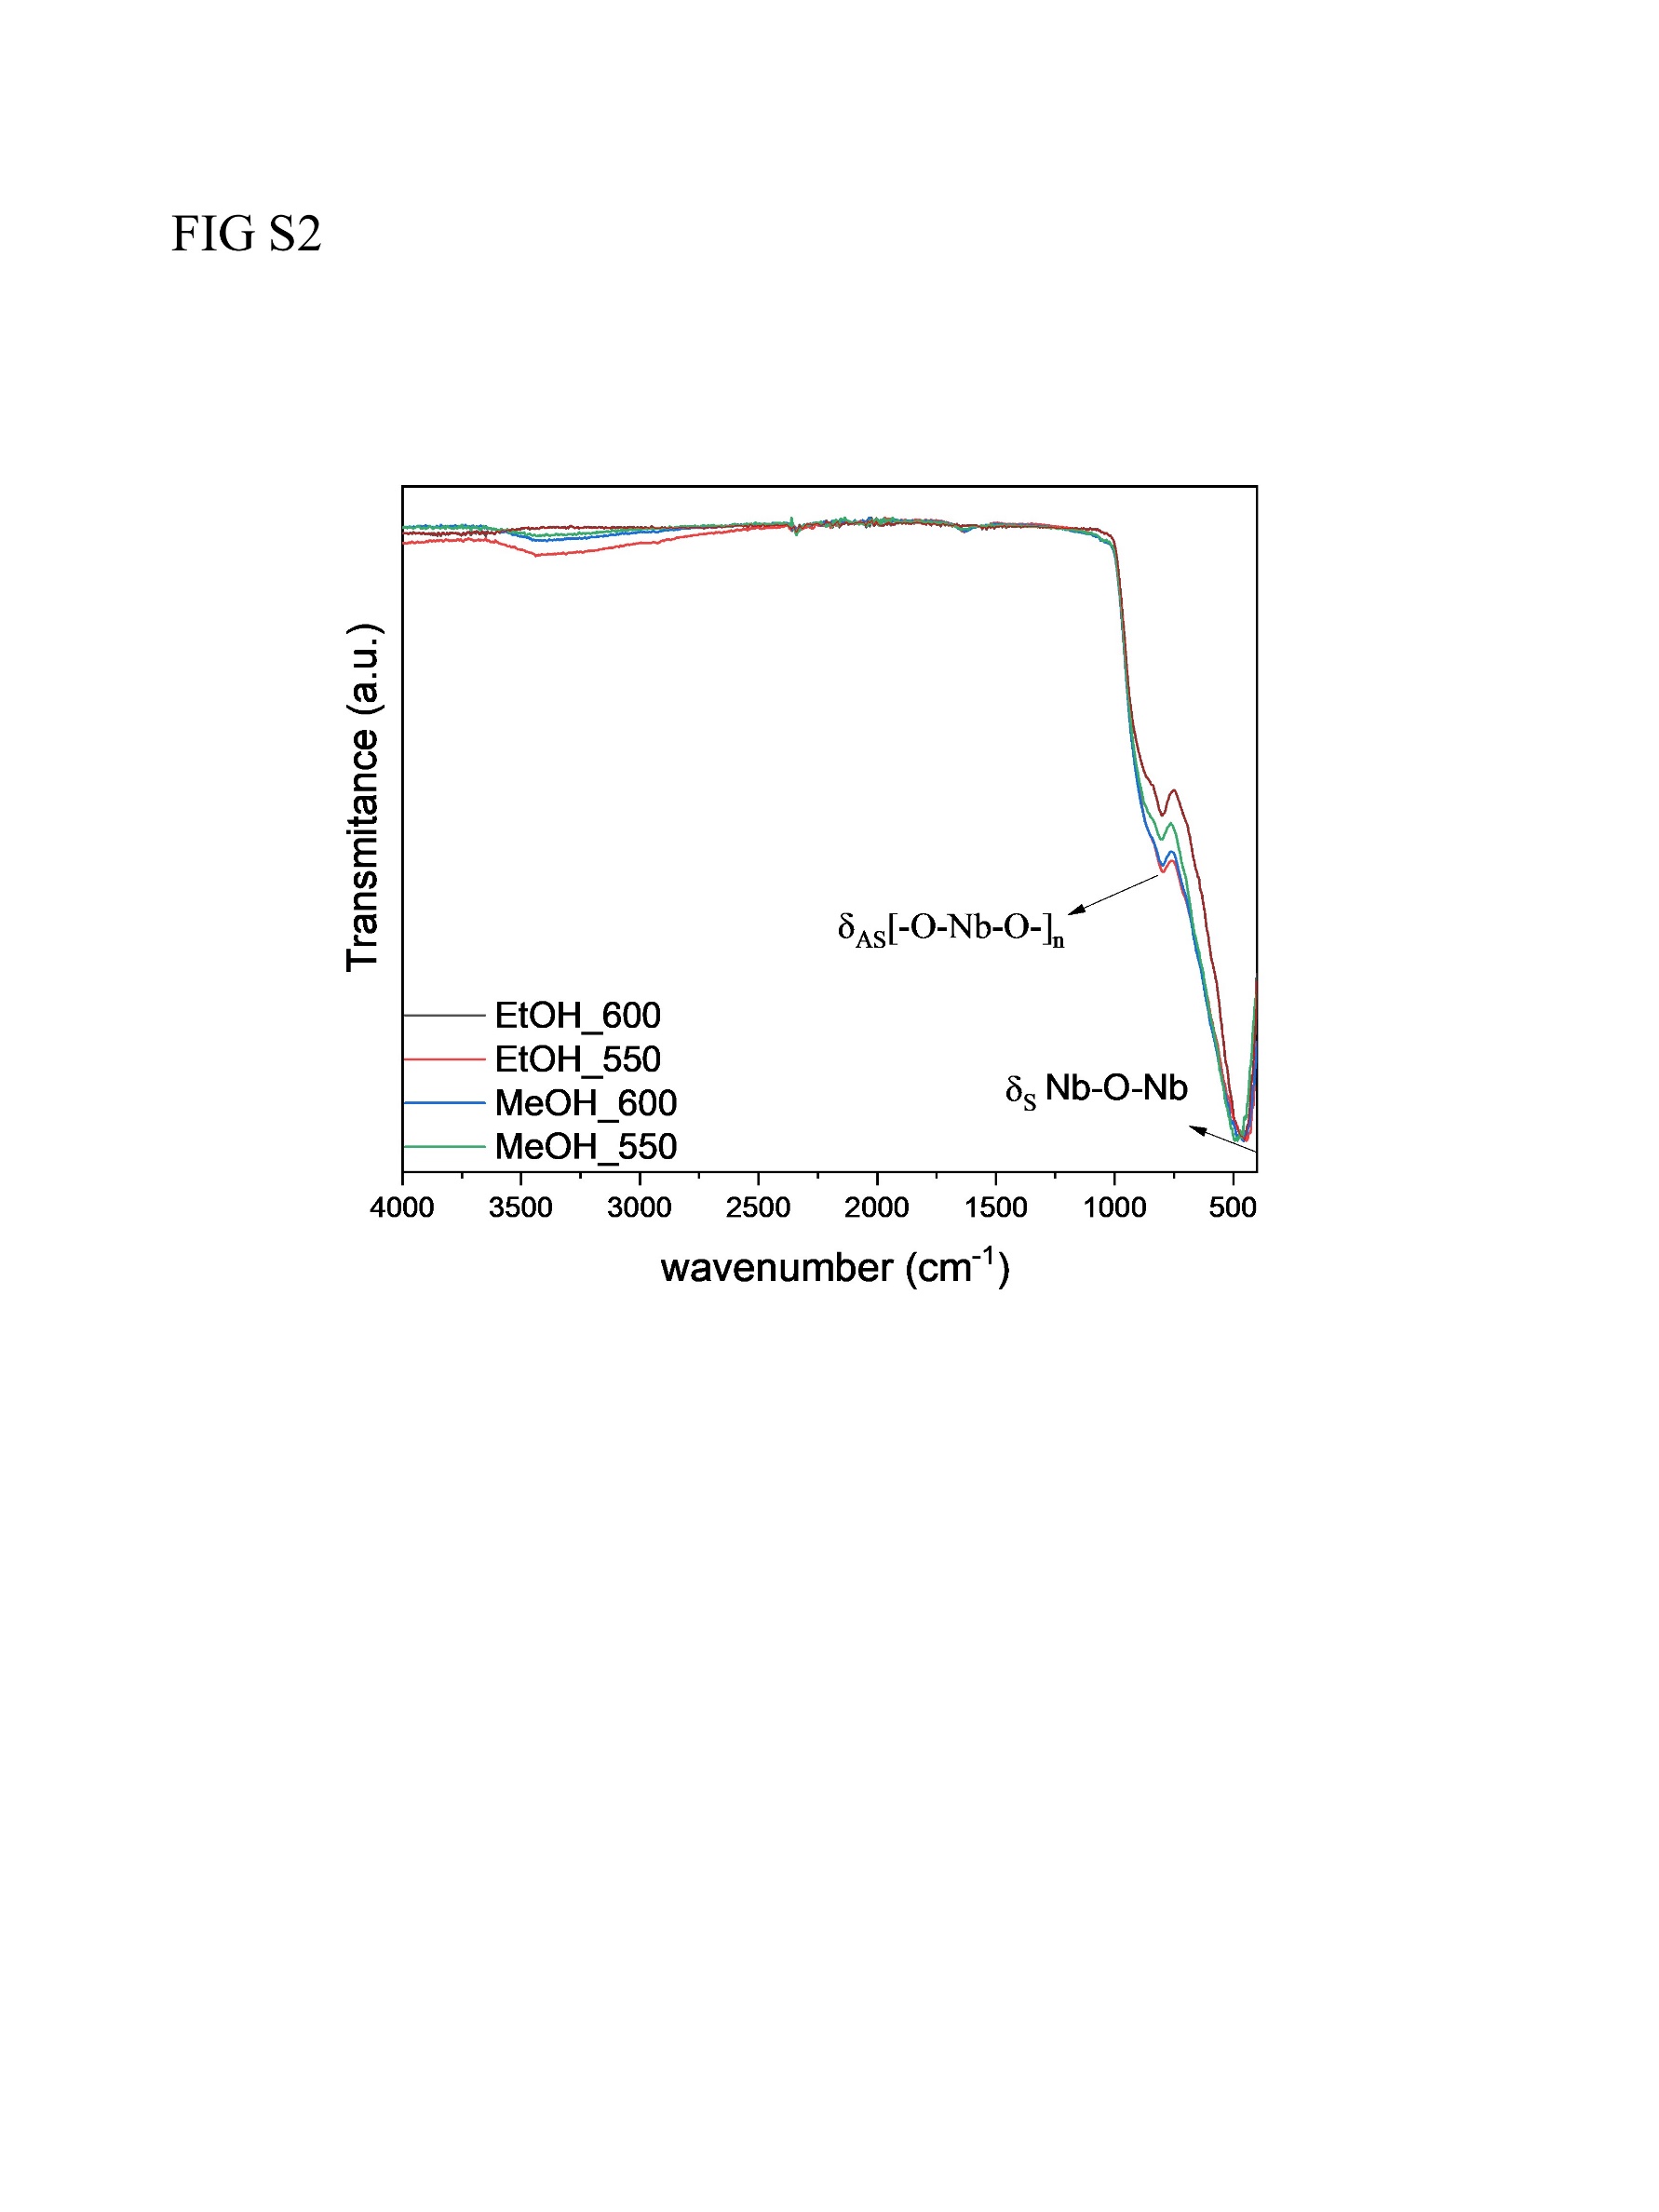

Supplement: Supplementary file 1 [file 19bef6275f83f03bfb37c5c5.docx]
